# Supplementary material
Source: Springer Nature journal article supplement (https://www.springermedizin.de/resource/supplementary/12913_2009_1343_MOESM2_ESM.pdf/9527924)
Supplement: MOESM2 [file 9527924]

# PRISMS – Patient Report Informing Self-Management Support

Please put a cross on the line to show how much of a problem each item is for you.

Things that might concern you:

|  |                                 |    |   |       |   |        |
|--|---------------------------------|----|---|-------|---|--------|
|  | Fatigue and lack of energy      | OK | ☺ | _____ | ☹ | Not OK |
|  | Stress, worry and emotions      | OK | ☺ | _____ | ☹ | Not OK |
|  | Shortness of breath             | OK | ☺ | _____ | ☹ | Not OK |
|  | Pain and physical discomfort    | OK | ☺ | _____ | ☹ | Not OK |
|  | Sleep problems                  | OK | ☺ | _____ | ☹ | Not OK |
|  | Managing to work                | OK | ☺ | _____ | ☹ | Not OK |
|  | Support from family and friends | OK | ☺ | _____ | ☹ | Not OK |
|  | Support from the NHS            | OK | ☺ | _____ | ☹ | Not OK |

Do you feel that you need support with:

|  |                                                       |    |   |       |   |           |
|--|-------------------------------------------------------|----|---|-------|---|-----------|
|  | Understanding your condition                          | OK | ☺ | _____ | ☹ | Need help |
|  | Being able to relax                                   | OK | ☺ | _____ | ☹ | Need help |
|  | Doing exercise                                        | OK | ☺ | _____ | ☹ | Need help |
|  | Getting out and doing the things that you like to do? | OK | ☺ | _____ | ☹ | Need help |
|  | Sexual problems and intimacy                          | OK | ☺ | _____ | ☹ | Need help |
|  | Healthy eating                                        | OK | ☺ | _____ | ☹ | Need help |
|  | Stopping smoking                                      | OK | ☺ | _____ | ☹ | Need help |
|  | Managing your medicines                               | OK | ☺ | _____ | ☹ | Need help |
|  | Monitoring your condition and dealing with flare ups  | OK | ☺ | _____ | ☹ | Need help |
|  | Any other problem? Please describe.                   |    |   |       |   |           |

Now, please put a cross beside the 3 items you feel that you need most help with.
